# Supplementary material for: The Optimal Cutoff Value of Tumor Markers for Prognosis Prediction in Ampullary Cancer
Source: MDPI journal article supplement (doi:10.3390/cancers15082281), 2023-04-13
Supplement: s1 [file s1]

**Supplement Table S1.** Prognostic factors for overall survival (CA 19-9 level cut-off: 36 U/mL).

|                                     |      |         | Univariate analysis |         | Multivariate analysis |         |
|-------------------------------------|------|---------|---------------------|---------|-----------------------|---------|
| Patients (n=385)                    |      |         | HR (95% CI)         | P-value | HR (95% CI)           | P-value |
| Preoperative CEA, ≤5.0/>5.0 (ng/mL) |      | 362/23  | 1.80 (1.07-3.01)    | 0.026   | 1.11 (0.65-1.88)      | 0.523   |
| Preoperative CA19-9, ≤36/>36 (U/mL) |      | 249/136 | 1.90 (1.41-2.55)    | <0.001  | 1.25 (0.91-1.71)      | 0.123   |
| Total bilirubin, <2.0/≥2.0 (mg/dl)  |      | 215/170 | 1.54 (1.14-2.09)    | 0.005   | 1.38 (1.01-1.88)      | 0.044   |
| Histologic grade                    | WD   | 128     | Reference           | -       | Reference             | -       |
|                                     | MD   | 210     | 2.29 (1.56-3.35)    | <0.001  | 1.84 (1.25-2.72)      | 0.002   |
|                                     | PD   | 34      | 5.77 (3.45-9.64)    | <0.001  | 4.77 (2.82-8.06)      | <0.001  |
| T stage                             | T1   | 128     | Reference           | -       | Reference             | -       |
|                                     | T2   | 119     | 1.87 (1.21-2.90)    | 0.005   | 1.00 (0.63-1.60)      | 0.176   |
|                                     | T3/4 | 138     | 3.14 (2.08-4.73)    | <0.001  | 1.36 (0.85-2.16)      | 0.042   |
| N stage                             | N0   | 271     | Reference           | -       | Reference             | -       |
|                                     | N+   | 114     | 2.82 (2.09-3.79)    | <0.001  | 1.75 (1.27-2.43)      | 0.001   |
| R status                            | R0   | 383     | Reference           | -       | Reference             | -       |
|                                     | R1   | 2       | 1.16 (0.16-8.30)    | 0.881   | 0.70 (0.10-5.11)      | 0.767   |
| Adjuvant chemotherapy               | No   | 203     | Reference           | -       | Reference             | -       |
|                                     | Yes  | 182     | 2.84 (2.07-3.90)    | <0.001  | 2.19 (1.55-3.09)      | <0.001  |
