# Supplementary material for: The Optimal Cutoff Value of Tumor Markers for Prognosis Prediction in Ampullary Cancer
Source: MDPI journal article supplement (doi:10.3390/cancers15082281), 2023-04-13
Supplement: s1 [file s1]

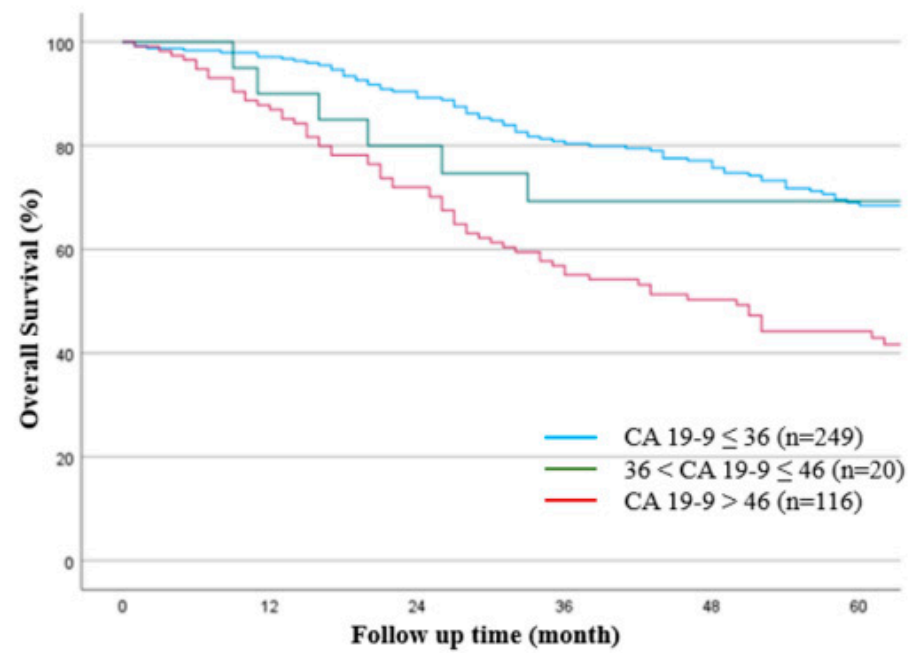

| Risk group             | 5yr OS rate (%) | Median (m)  |
|------------------------|-----------------|-------------|
| CA 19-9 $\leq$ 36      | 69.1            | Not reached |
| 36 < CA 19-9 $\leq$ 46 | 69.3            | Not reached |
| CA 19-9 > 46           | 44.2            | 50.0        |

**Supplement Figure S3.** Survival outcomes according to the CA 19-9 level subgroups
