# Supplementary material for: The Optimal Cutoff Value of Tumor Markers for Prognosis Prediction in Ampullary Cancer
Source: MDPI journal article supplement (doi:10.3390/cancers15082281), 2023-04-13
Supplement: s1 [file s1]

(a)

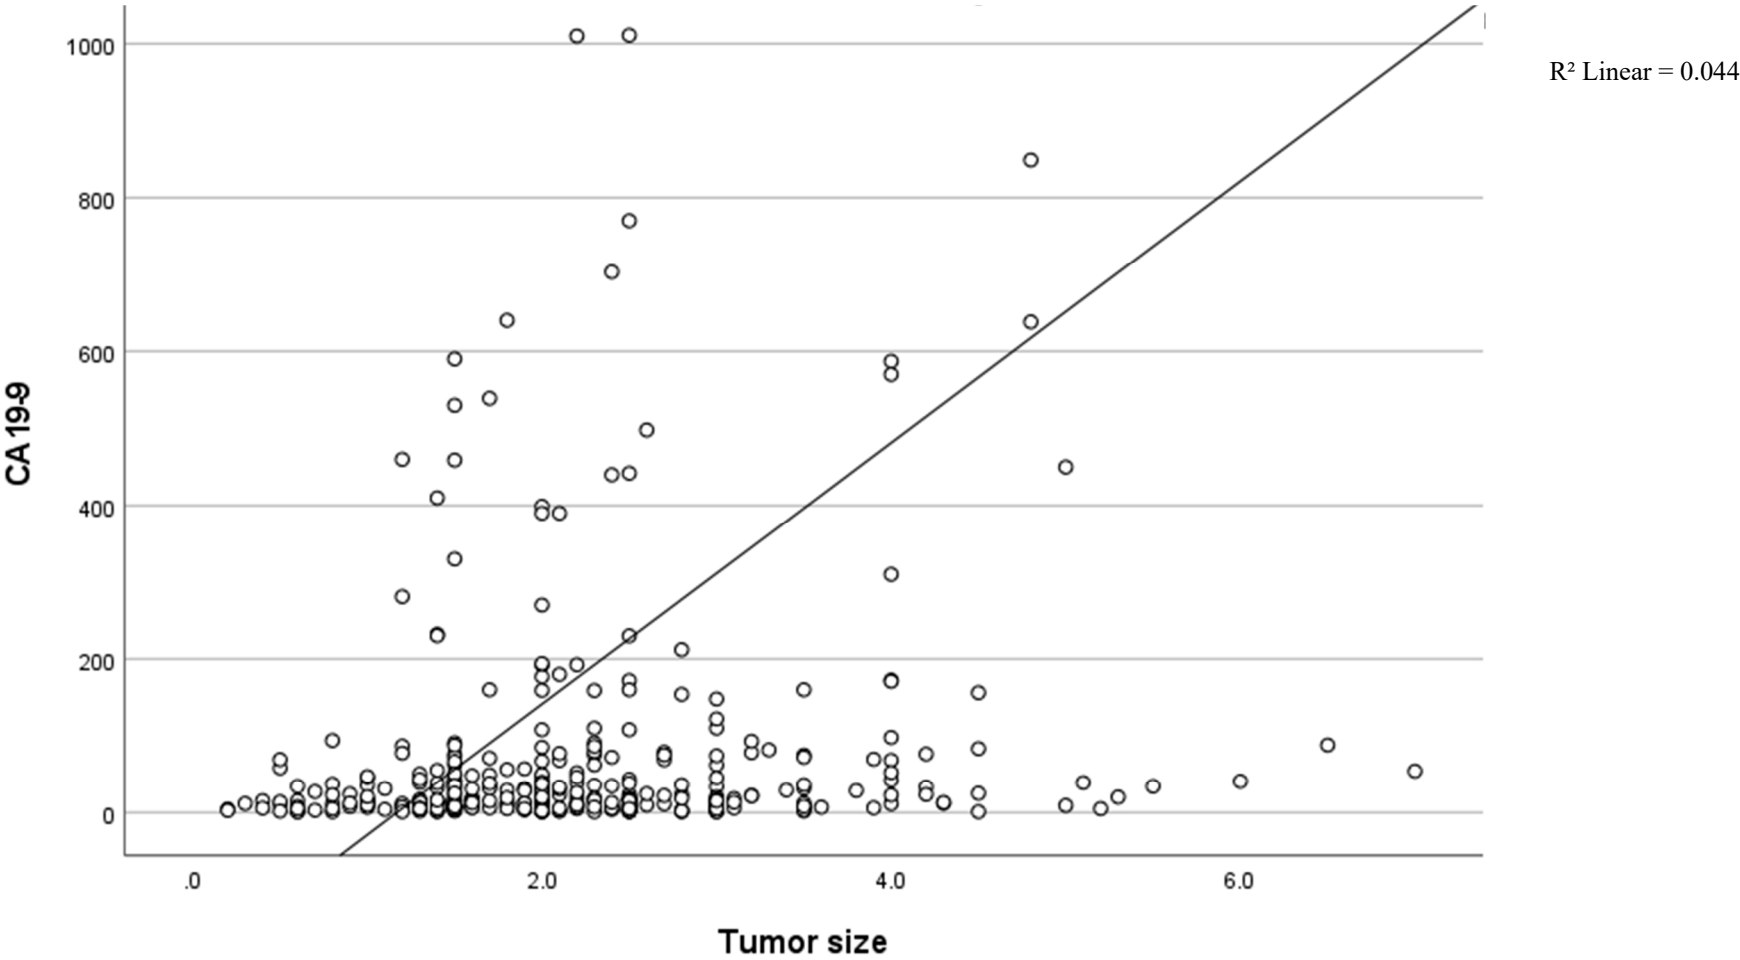

(b)

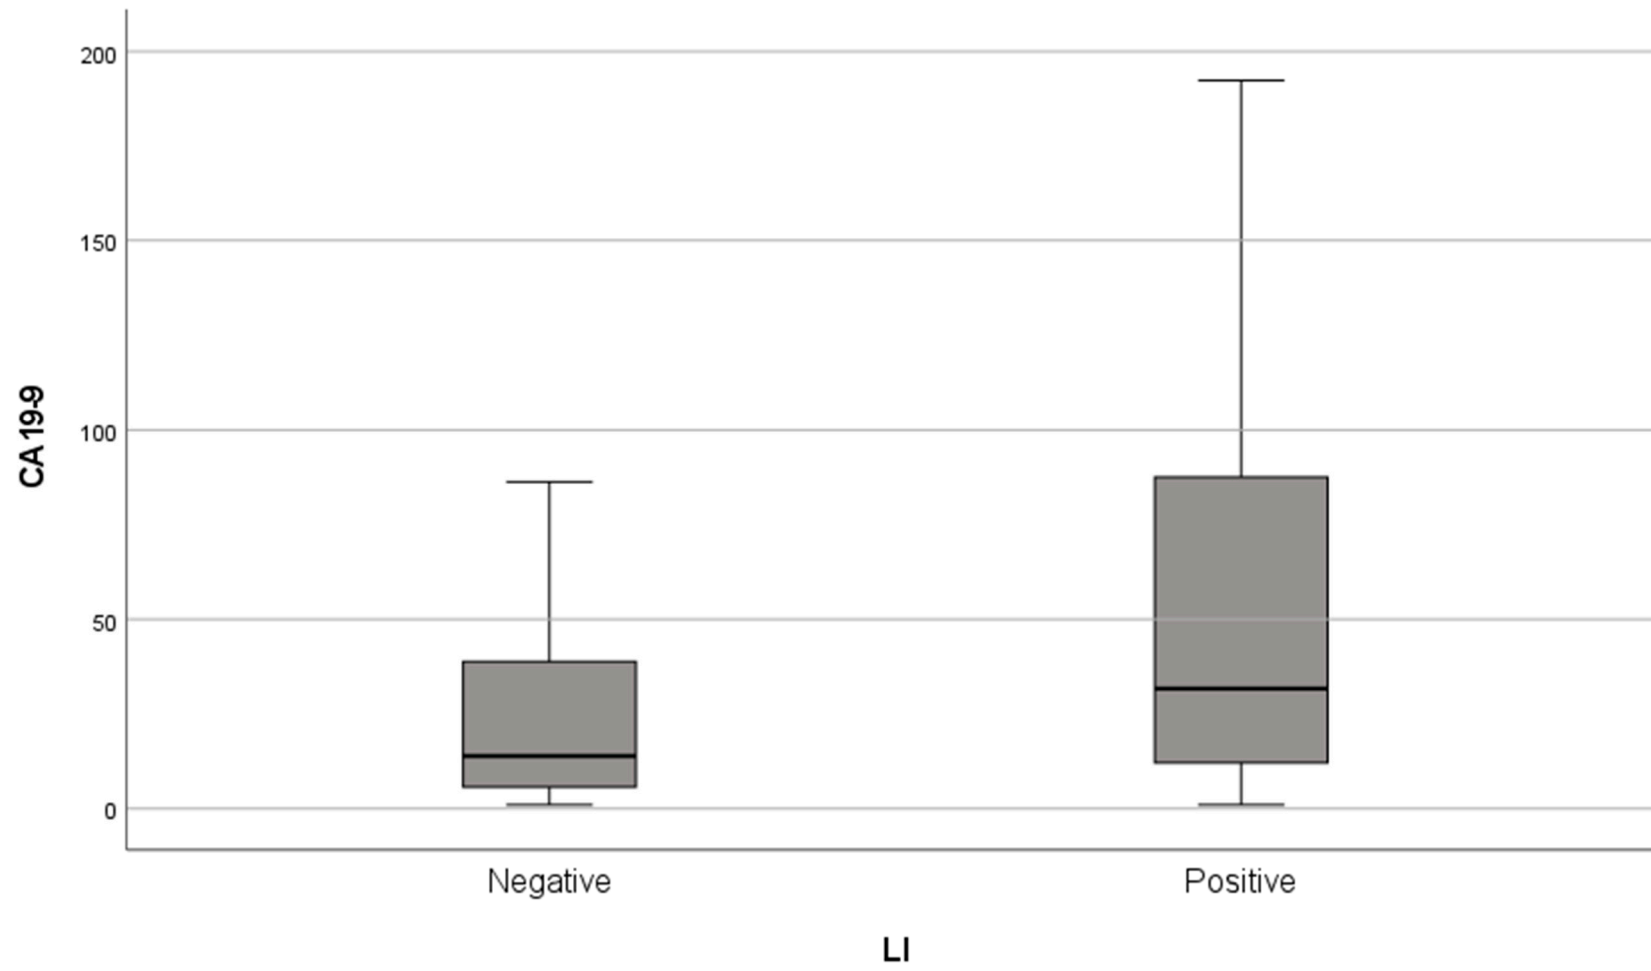

(c)

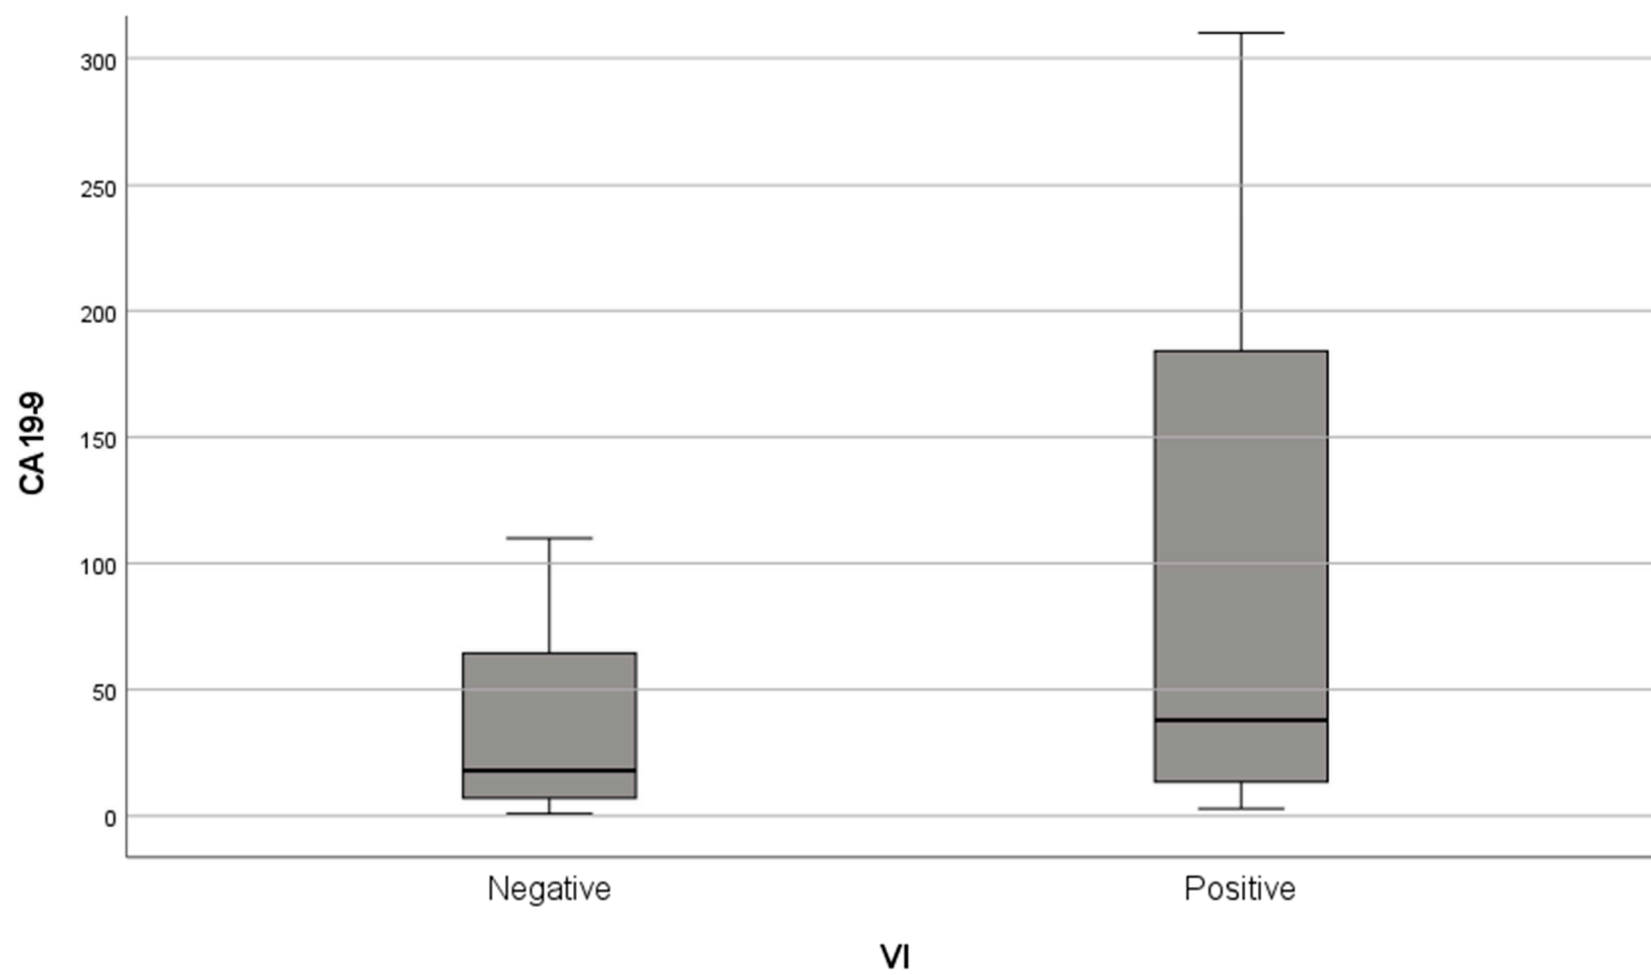

(d)

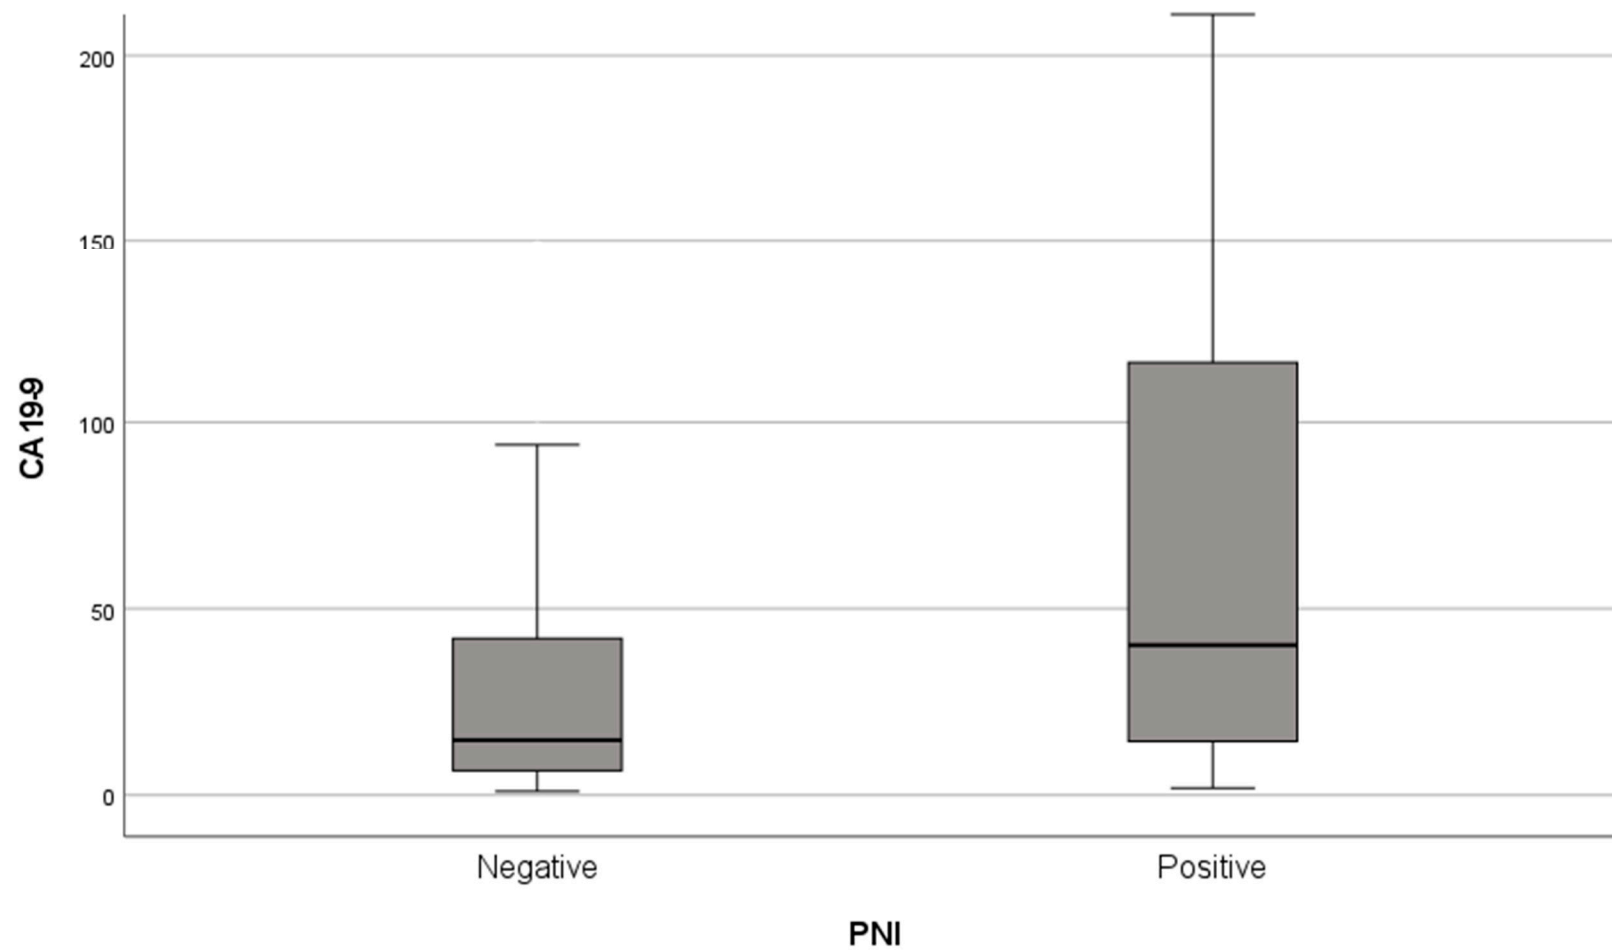

**Supplement Figure S2. (a)** CA 19-9 level according to tumor size **(b)** CA 19-9 level according to lymphatic invasion (LI) **(c)** CA 19-9 level according to venous invasion (VI) **(d)** CA 19-9 level according to perineural invasion (PNI)
