# Supplementary material for: The Optimal Cutoff Value of Tumor Markers for Prognosis Prediction in Ampullary Cancer
Source: MDPI journal article supplement (doi:10.3390/cancers15082281), 2023-04-13
Supplement: s1 [file s1]

(a)

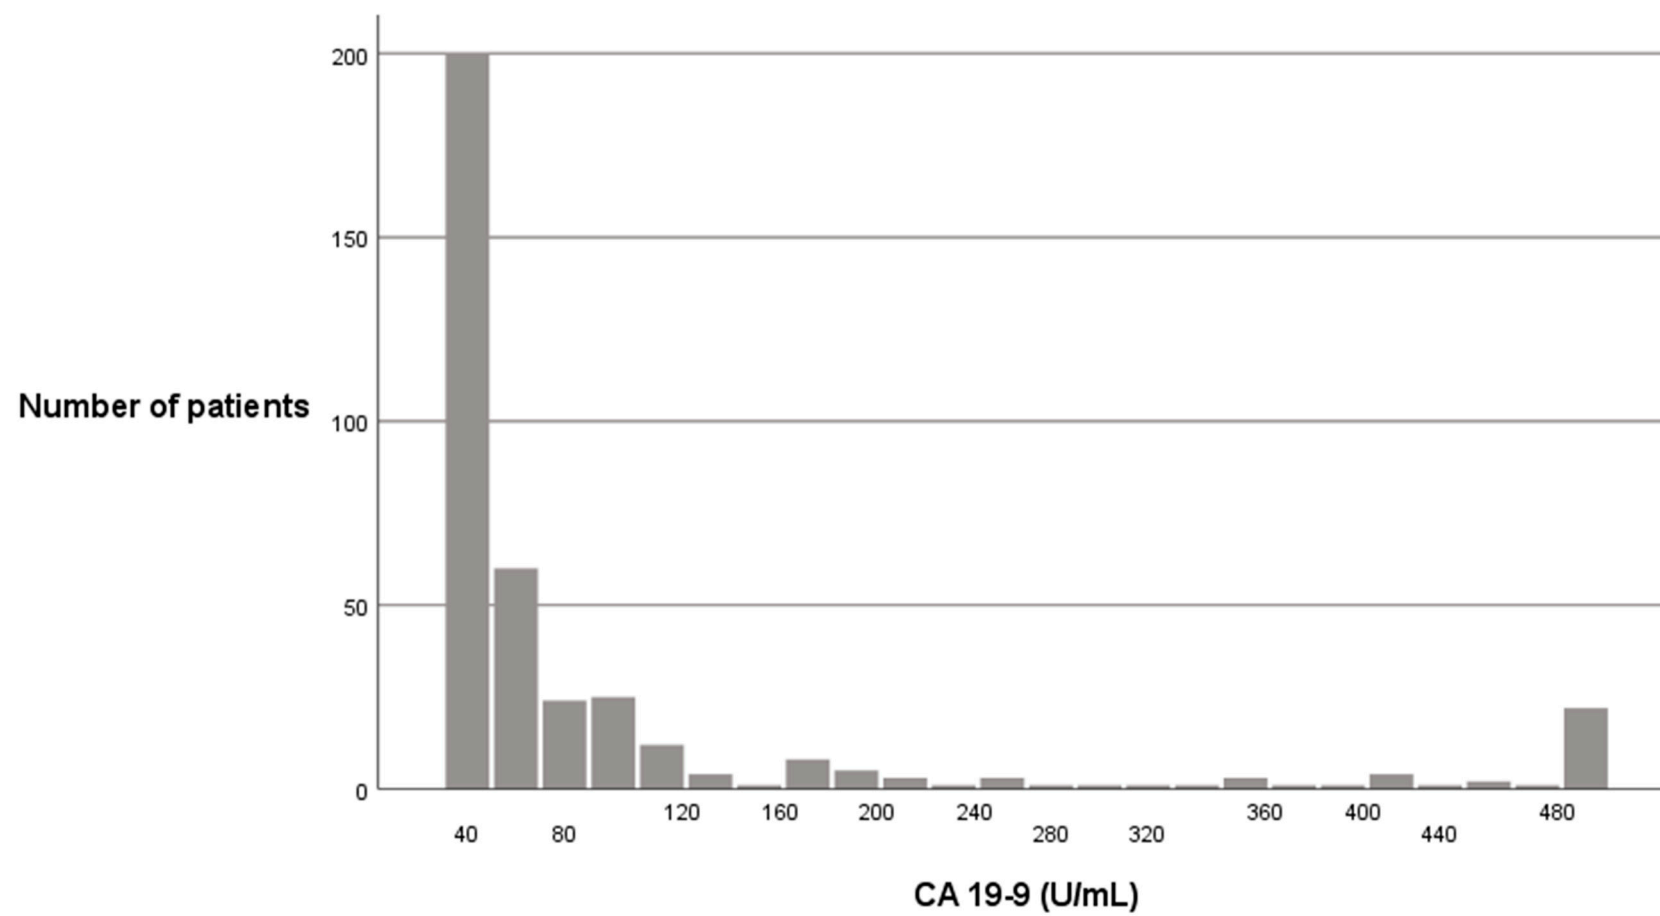

(b)

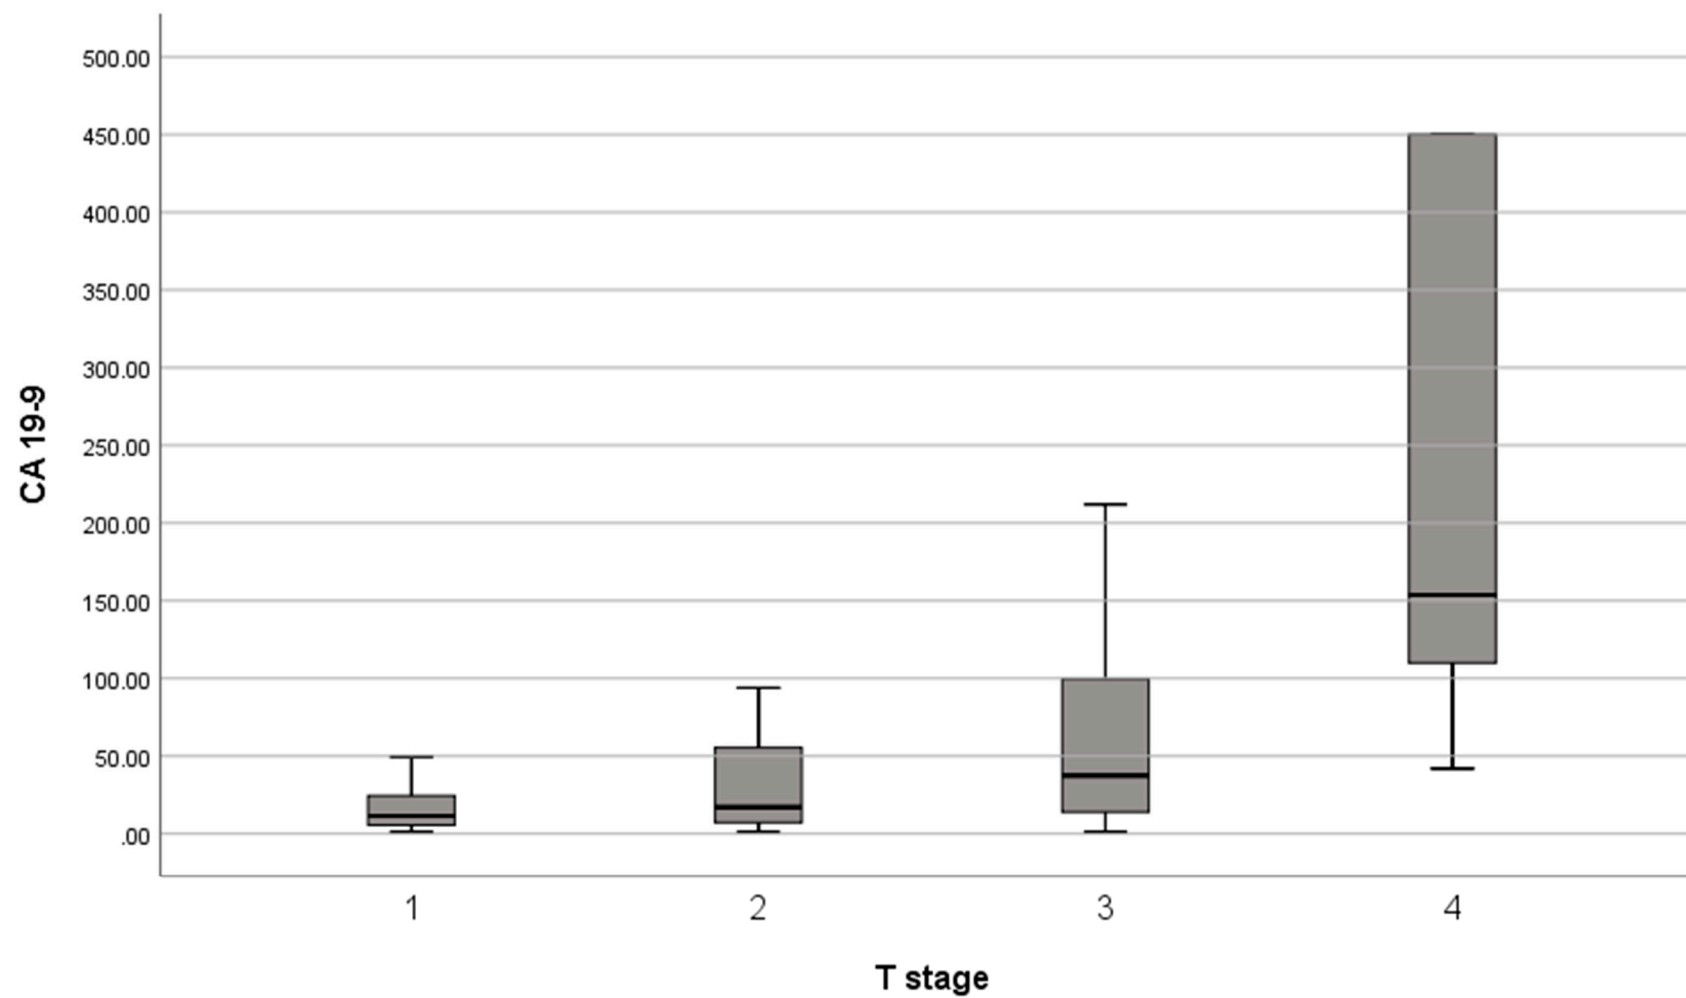

(c)

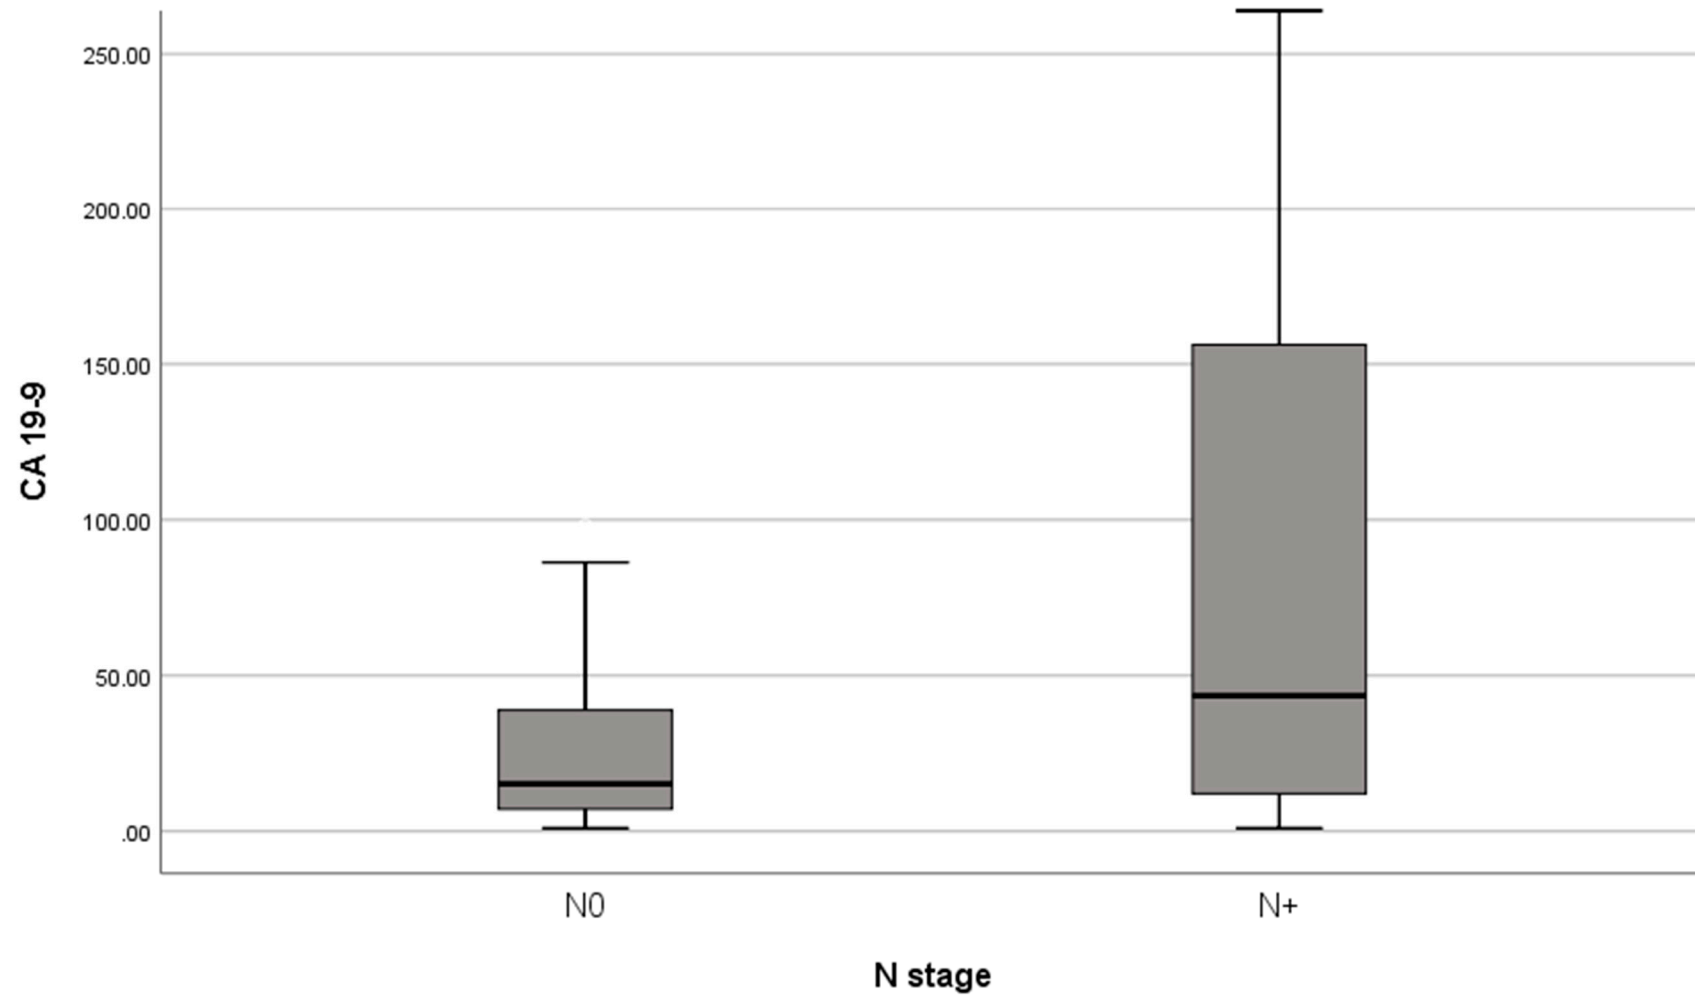

**Supplement Figure S1.** (a) Tumor marker distribution (b) Tumor marker distribution in T stage (c) Tumor marker distribution in N stage
